**JUST  
PUBLISHED!**

## Management of Adults With Traumatic Brain Injury

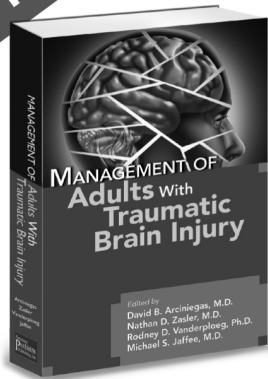

Edited by  
David B. Arciniegas, M.D.,  
Nathan D. Zasler, M.D.,  
Rodney D. Vanderploeg, Ph.D.,  
and Michael S. Jaffee, M.D.

*Management of Adults with Traumatic Brain Injury* is an up-to-the-minute, comprehensive, and useful text designed to support busy physicians, nurses, and mental health professionals

working with persons with traumatic brain injury (TBI) and their families. Understanding and improving outcomes after TBI requires consideration of the effects of biomechanical forces on the brain and the interactions between the injury, the person experiencing it, and the psychosocial context in which TBI and its consequences occur.

A multidisciplinary approach to the management of persons with TBI therefore is essential. Accordingly, this book presents and synthesizes the work of internationally recognized brain injury clinicians, scientists, and educators who were selected by a team of editors with backgrounds in psychiatry, neurology, psychology, and psychiatry. This broad range of perspectives enhances understanding and provides nuanced yet practical information on the neuropsychiatric management of persons with TBI.

Evidence-informed, concise, and clinically rich, this book will be of enormous value to health care providers grappling with the neurological and mental health consequences of this widespread public health problem.

The volume offers many useful features to its readers, including:

- Chapters written by an internationally known group of editors and contributors offering cutting-edge, multidisciplinary perspectives in brain injury medicine.
- Guidance on the identification and management of early and late postinjury neuropsychiatric disturbances as well as their psychological and psychosocial consequences.
- Identification of special issues relevant to the evaluation and treatment of TBI and postconcussive symptoms among military service members and Veterans.
- Discussion of the ethics and methods of forensic assessment of persons with TBI.
- Key Clinical Points that highlight concepts, assessment issues, and clinical management strategies in each chapter.
- A wealth of tables and figures to enhance the accessibility and clinical utility of the book, as well as appendices of additional readings and relevant websites for persons and families affected by TBI and the clinicians providing their care.

Impressive breadth and depth of coverage, logical structure, clinically rich detail, and concise presentation make *Management of Adults with Traumatic Brain Injury* a must-read for every physician, nurse, and mental health practitioner working to improve the lives of persons with TBI.

**2013 • 587 pages • ISBN 978-1-58562-404-1 • Paperback  
\$79.00 • Item #62404**

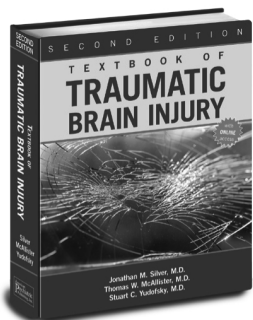

### Textbook of Traumatic Brain Injury, Second Edition

Edited by Jonathan M. Silver, M.D.,  
Thomas W. McAllister, M.D.,  
and Stuart C. Yudofsky, M.D.

This edition of *Textbook of Traumatic Brain Injury* has been thoroughly revised and updated from the 2005

first edition to reflect the exponential expansion of research and clinical data amassed in the intervening years. Each chapter was written and reviewed by the foremost authorities in neuropsychiatry, neurology, rehabilitation medicine, and the other specialties who assess, diagnose, and treat these patients.

The book has been closely edited to achieve a level of writing that is consistent and engaging and that addresses the needs of all medical professionals.

**2011 • 686 pages • ISBN 978-1-58562-357-0 • Hardcover  
\$169.00 • Item #62357**

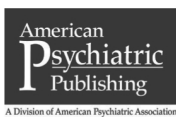

The *First* and *Last* Word in Psychiatry

Order Online: [www.appi.org](http://www.appi.org) • Phone: 1-800-368-5777

Fax: 703-907-1091 • Email: [appi@psych.org](mailto:appi@psych.org)

Find us on Facebook and Twitter.

Priority Code AH1315

**20% Discount  
For American Psychiatric  
Association Members!**

**25% Discount  
For APA Members-in-Training**
