# The DSM-5 debuts in May!

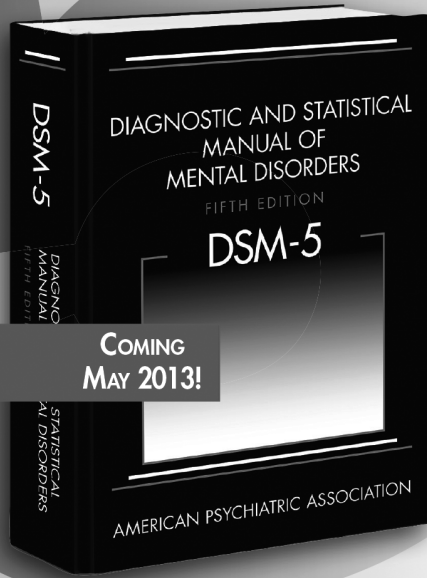

## Diagnostic and Statistical Manual of Mental Disorders, Fifth Edition (DSM-5)

American Psychiatric Association

This new edition of *Diagnostic and Statistical Manual of Mental Disorders* (DSM-5™), used by clinicians and researchers to diagnose and classify mental disorders, is the product of more than 10 years of effort by hundreds of international experts in all aspects of mental health. Their dedication and hard work have yielded an authoritative volume that defines and classifies mental disorders in order to improve diagnoses, treatment, and research.

The criteria are concise and explicit, intended to facilitate an objective assessment of symptom presentations in a variety of clinical settings—inpatient, outpatient, partial hospital, consultation-liaison, clinical, private practice, and primary care.

### New features and enhancements make DSM-5™ easier to use across all settings:

- The latest findings in neuroimaging and genetics have been integrated into each disorder along with gender and cultural considerations.
- The revised organizational structure recognizes symptoms that span multiple diagnostic categories, providing new clinical insight in diagnosis.
- Specific criteria have been streamlined, consolidated, or clarified to be consistent with clinical practice.
- Dimensional assessments for research and validation of clinical results have been provided.
- Both ICD-9-CM and ICD-10-CM codes are included for each disorder.

The *Diagnostic and Statistical Manual of Mental Disorders*, Fifth Edition, is the most comprehensive, current, and critical resource for clinical practice available to today's mental health professionals.

2013 • 1,000 pages • ISBN 978-0-89042-554-1 • Hardcover • \$199.00 • Item #2554

2013 • 1,000 pages • ISBN 978-0-89042-555-8 • Paperback • \$149.00 • Item #2555

Coming May 2013! Pre-order now @ [www.appi.org](http://www.appi.org) or call 1-800-368-5777

**DSM-5**  
COLLECTION  
Explore the  
DSM-5 Collection  
of related titles

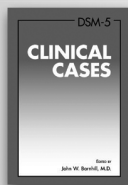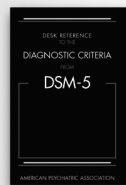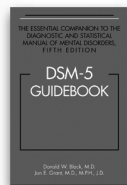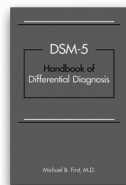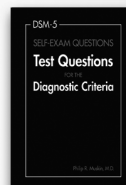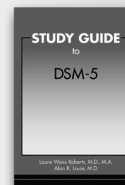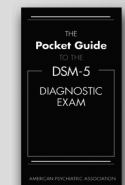

Coming Summer 2013!

Pre-order now @ [www.appi.org](http://www.appi.org) or call 1-800-368-5777

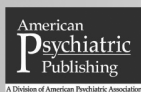

The *First and Last* Word in Psychiatry

Order Online: [www.appi.org](http://www.appi.org) • Phone: 1-800-368-5777 • Email: [appi@psych.org](mailto:appi@psych.org) • Fax: 703-907-1091

20% Discount For American Psychiatric Association Members! 25% Discount For APA Members-in-Training!

Priority Code AH1302
