# FOCUS

THE JOURNAL OF LIFELONG LEARNING IN PSYCHIATRY

## *Personality Disorders*

*Guest Editors: John M. Oldham, M.D.  
J. Christopher Fowler, Ph.D.*

### IN CLINICAL SYNTHESIS:

Co-Occurring Disorders and Treatment  
Complexity Within Personality Disorders

*J. Christopher Fowler, Ph.D.  
John M. Oldham, M.D.*

Borderline Personality Disorder

*John G. Gunderson, M.D.  
Igor Weinberg, Ph.D.  
Lois Choi-Kain, M.D.*

Antisocial Personality Disorder:  
A Mentalizing Framework

*Anthony Bateman, M.A., F.R.C.Psych.  
Rory Bolton, Ph.D.  
Peter Fonagy, Ph.D., F.B.A.*

Personality Disorders in DSM-5 Section III

*Andrew E. Skodol, M.D., et al.*

AND INFLUENTIAL PUBLICATIONS...
